# Supplementary material for: Structure of transcribing RNA polymerase II-nucleosome complex
Source: PubMed Central journal article supplement (PMC6303367; doi:10.1038/s41467-018-07870-y), 2018-12-21
Supplement: 41467_2018_7870_MOESM2_ESM.pdf [file 41467_2018_7870_MOESM2_ESM.pdf]

Supplementary Movie 1:

Cryo-EM density and structure of the Pol II-NCP complex

Supplementary Table 1:

Cryo-EM data collection, refinement, and validation statistics
